# Supplementary material
Source: PubMed Central journal article supplement (PMC10530192)
Supplement: NIHMS1915931-supplement-6.pdf [file NIHMS1915931-supplement-6.pdf]

**Table S1: Locus sequencing at potential off-target sites for the insulator sgRNA, related to Figure 2**  
 Locus sequencing data shows lack of edits at potential off-target sites with a PAM for the insulator sgRNA.  
 N.D = not detected.

|                          | Number of Mismatches (MM) | Binding sites in genome with adjacent PAM site | Chromosome coordinates of target sites with PAM (mm10) | Features of target site        | CTCF peak in targeted region | Mutation frequency in Cas9-NT (%) | Mutation frequency in Cas9-Insulator (%) |
|--------------------------|---------------------------|------------------------------------------------|--------------------------------------------------------|--------------------------------|------------------------------|-----------------------------------|------------------------------------------|
| <b><u>On target</u></b>  | 0                         | 1                                              | chr5:75210053                                          | targeted PDGFRA insulator site | Yes                          | N.D                               | 100%                                     |
| <b><u>Off target</u></b> | 1                         | 0                                              | -                                                      | -                              | -                            | -                                 | -                                        |
|                          | 2                         | 0                                              | -                                                      | -                              | -                            | -                                 | -                                        |
|                          | 3                         | 0                                              | -                                                      | -                              | -                            | -                                 | -                                        |
|                          | 4                         | 5                                              | chr2:123471441                                         | Intergenic                     | No                           | N.D                               | N.D                                      |
|                          |                           |                                                | chr12:32686058                                         | Intergenic                     | No                           | N.D                               | N.D                                      |
| chr17:85028268           |                           |                                                | promoter of <i>Slc3a1</i>                              | No                             | N.D                          | N.D                               |                                          |
| chr6:10747137            |                           |                                                | Intergenic                                             | No                             | N.D                          | N.D                               |                                          |
| chr10:23307984           |                           |                                                | Intron of <i>Eya4</i>                                  | No                             | N.D                          | N.D                               |                                          |

**Table S2: Locus sequencing at potential off-target sites for the RFXmotif sgRNA, related to Figure 2**

Locus sequencing data shows lack of edits at potential off-target sites for the RFXmotif sgRNA, with exception of an intronic site with low-level editing. N.D = not detected. (\*) = evaluated using ChIP-seq sequencing data.

|                          | Number of Mismatches (MM) | Binding sites in genome with adjacent PAM site | Chromosome coordinates of target sites with PAM (mm10) | Features of target site   | H3K27ac peak in targeted region | Mutation frequency in Cas9-NT (%) | Mutation frequency in Cas9-RFXmotif (%) |
|--------------------------|---------------------------|------------------------------------------------|--------------------------------------------------------|---------------------------|---------------------------------|-----------------------------------|-----------------------------------------|
| <b><u>On target</u></b>  | 0                         | 1                                              | chr5:75223009                                          | targeted enhancer         | Yes                             | 0%                                | 100%                                    |
| <b><u>Off target</u></b> | 1                         | 0                                              | -                                                      | -                         | -                               | -                                 | -                                       |
|                          | 2                         | 1                                              | chr9:57715379                                          | Intron of <i>Edc3</i>     | No                              | N.D                               | <10%                                    |
|                          | 3                         | 12                                             | chr8:123069125                                         | Intron of <i>Spg7</i> *   | No                              | N.D                               | N.D                                     |
|                          |                           |                                                | chr5:71780635                                          | Intron of <i>Gabrb1</i>   | No                              | N.D                               | N.D                                     |
|                          |                           |                                                | chr1:23835089                                          | Intron of <i>B3gat2</i>   | No                              | N.D                               | N.D                                     |
|                          |                           |                                                | chr1:51596428                                          | Intergenic                | No                              | N.D                               | N.D                                     |
|                          |                           |                                                | chr2:127890371                                         | Intron of <i>Acox1</i>    | No                              | N.D                               | N.D                                     |
|                          |                           |                                                | chr2:167747246                                         | Intergenic*               | Yes                             | N.D                               | N.D                                     |
|                          |                           |                                                | chr12:85571470                                         | Intergenic*               | Yes                             | N.D                               | N.D                                     |
|                          |                           |                                                | chr4:142838737                                         | Intergenic                | No                              | N.D                               | N.D                                     |
|                          |                           |                                                | chr6:119023380                                         | Intron of <i>Cacna1c</i>  | No                              | N.D                               | N.D                                     |
|                          |                           |                                                | chr11:74400961                                         | Intron of <i>Rap1gap2</i> | No                              | N.D                               | N.D                                     |
| chr19:10299031           | Intron of <i>Dagla</i>    | No                                             | N.D                                                    | N.D                       |                                 |                                   |                                         |
| chr3:138803897           | Intron of <i>Tspan5</i> * | Yes                                            | N.D                                                    | N.D                       |                                 |                                   |                                         |

**Table S3: Off-target analysis for the 3A3L-pCdkn2a sgRNAs, related to Figure 3**

sgRNA off-target analysis shows that the sgRNAs used for epigenetic editing do not have off-target sites with complementarity to both sgRNAs allowing up to 6 mismatches per gRNA.

|                          |                          | Number of Mismatches (MM) | Binding sites in genome with adjacent PAM site (within 1 KB of both guides) | Chromosome coordinates of target sites with PAM (mm10) | Features of target site | H3K27ac peak in targeted region |
|--------------------------|--------------------------|---------------------------|-----------------------------------------------------------------------------|--------------------------------------------------------|-------------------------|---------------------------------|
| <b>Convergent guides</b> | <b><u>On target</u></b>  | 0                         | 1                                                                           | Chr4:89294696-89294848                                 | targeted promoter       | Yes                             |
|                          |                          | 1                         | 0                                                                           | -                                                      | -                       | -                               |
|                          |                          | 2                         | 0                                                                           | -                                                      | -                       | -                               |
|                          |                          | 3                         | 0                                                                           | -                                                      | -                       | -                               |
|                          | <b><u>Off target</u></b> | 4                         | 0                                                                           | -                                                      | -                       | -                               |
|                          |                          | 5                         | 0                                                                           | -                                                      | -                       | -                               |
|                          |                          | 6                         | 0                                                                           | -                                                      | -                       | -                               |
