# Supplementary material
Source: PubMed Central journal article supplement (PMC10530192)

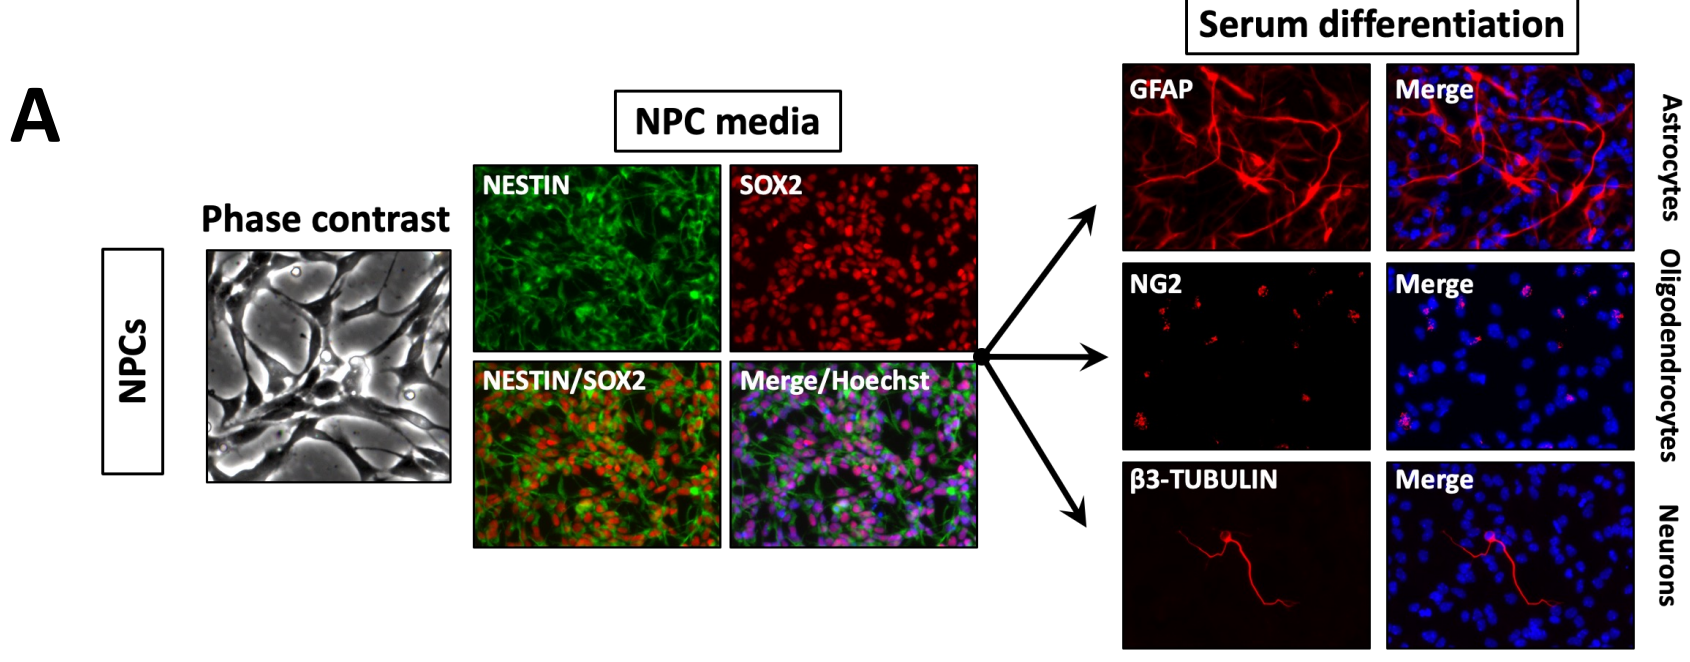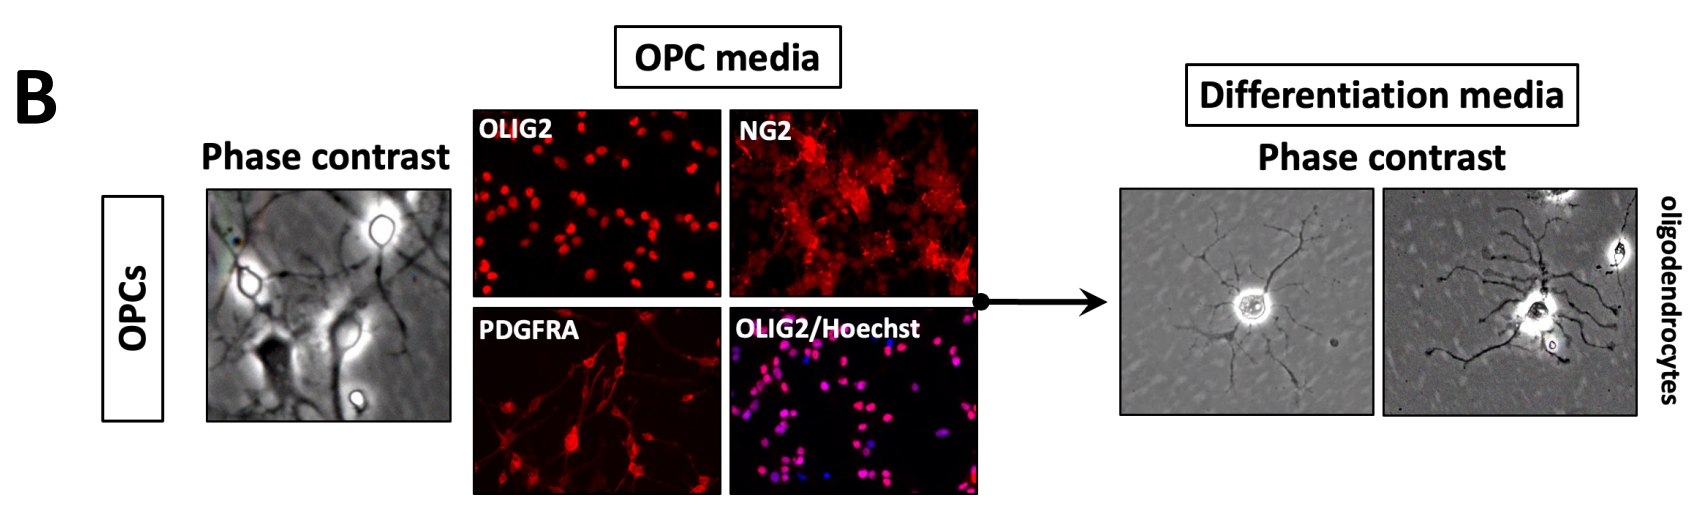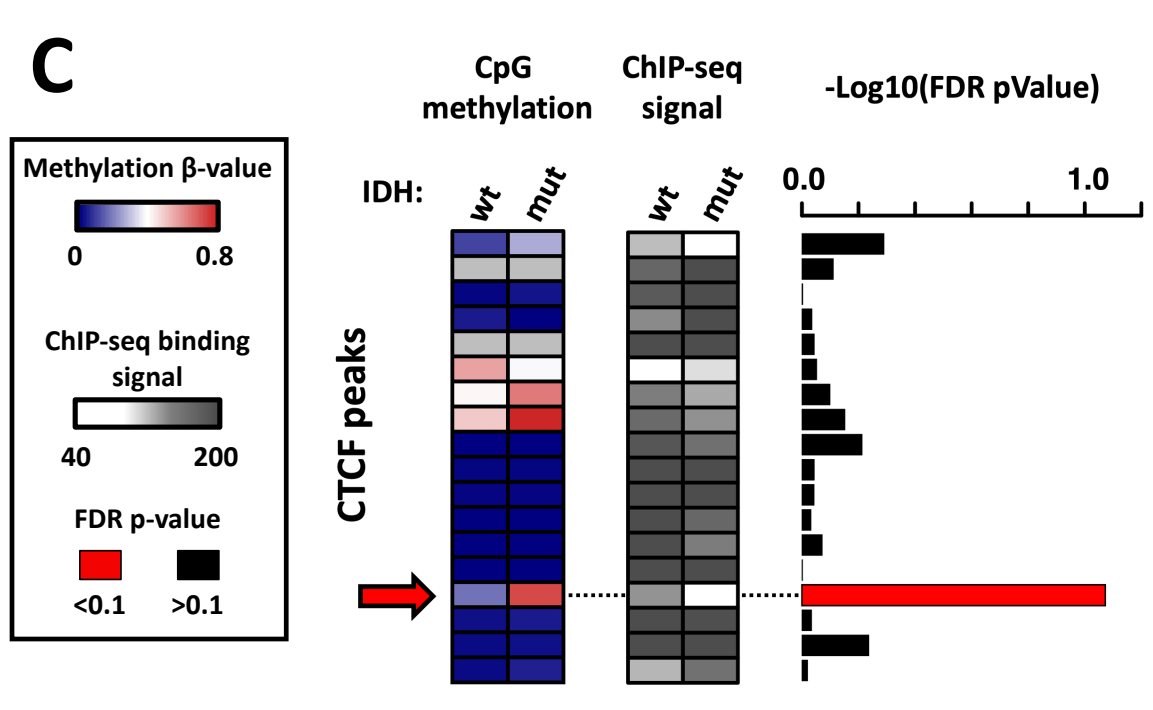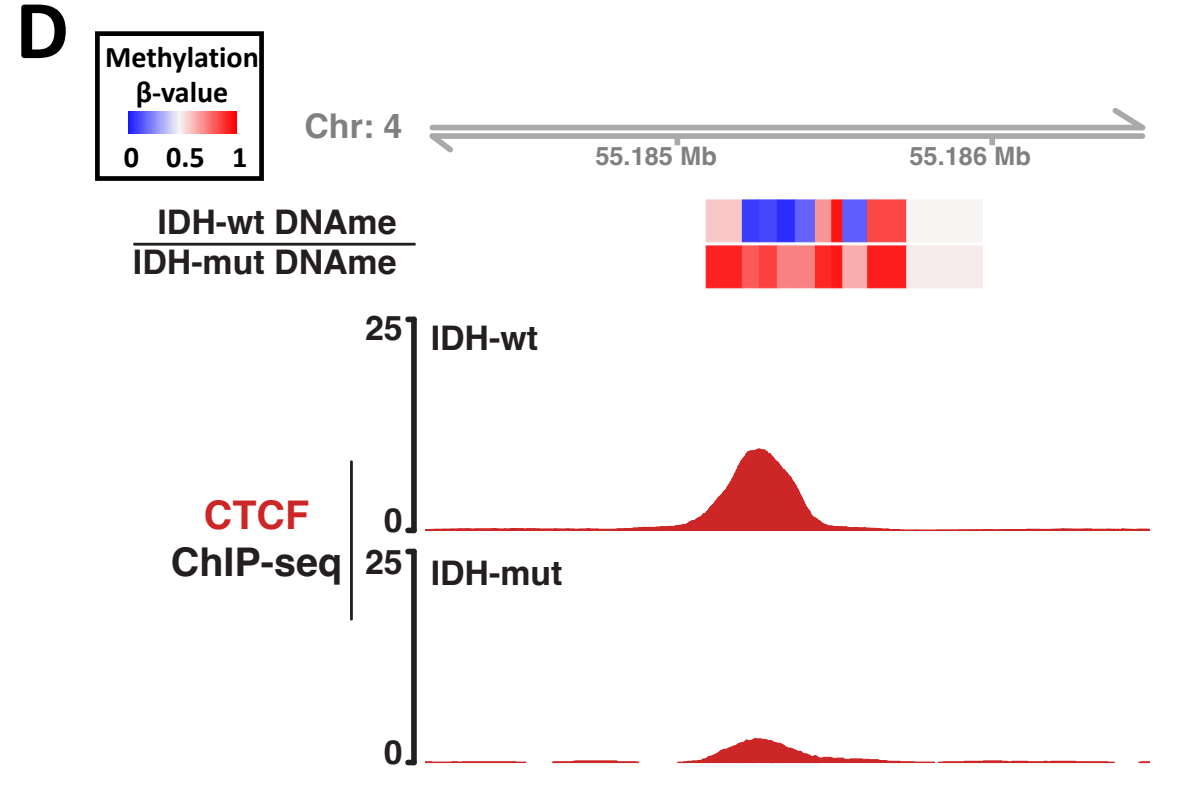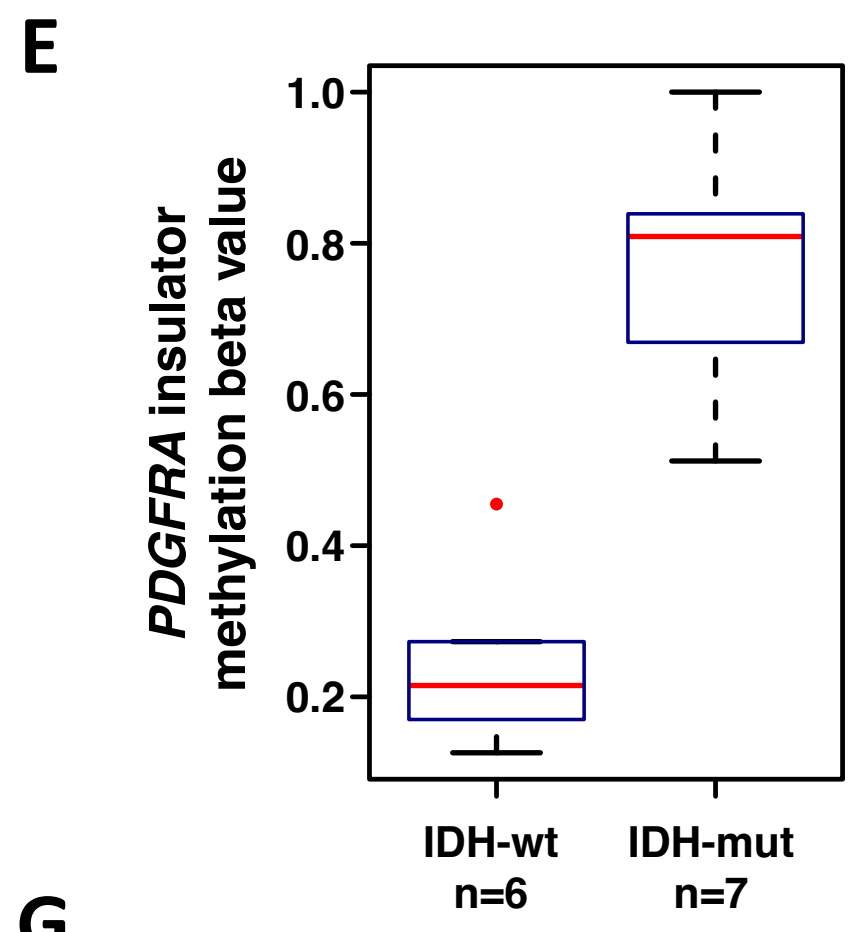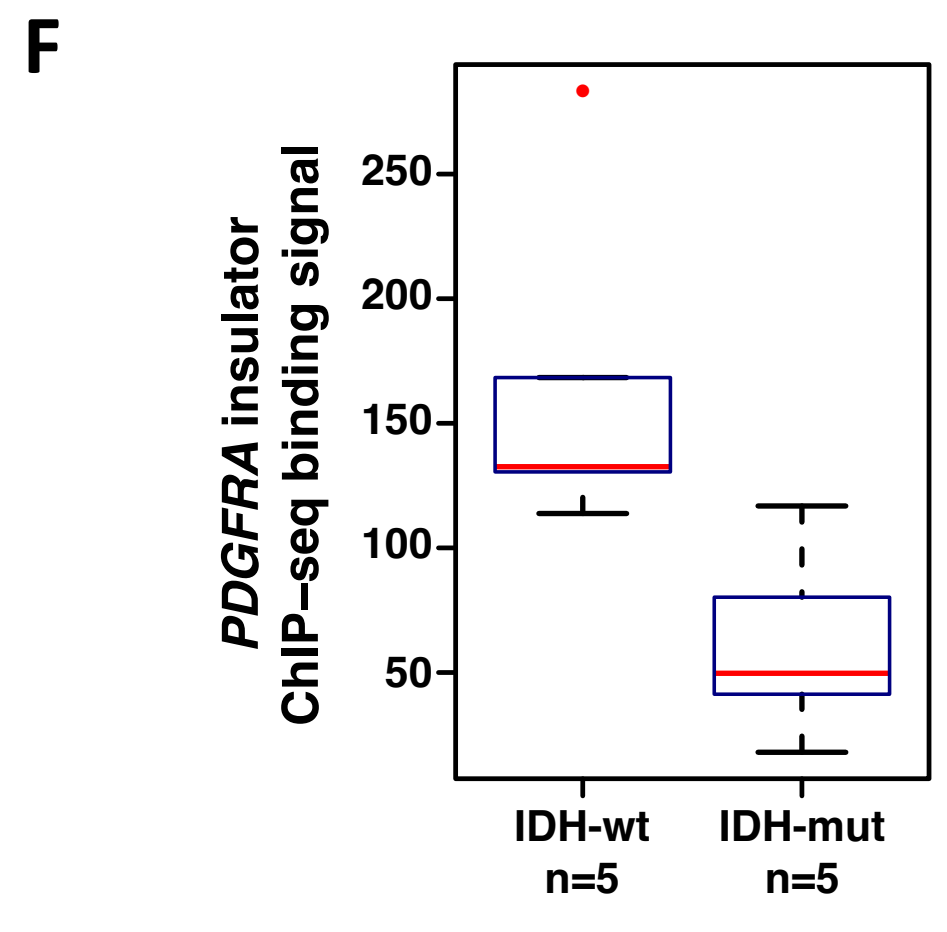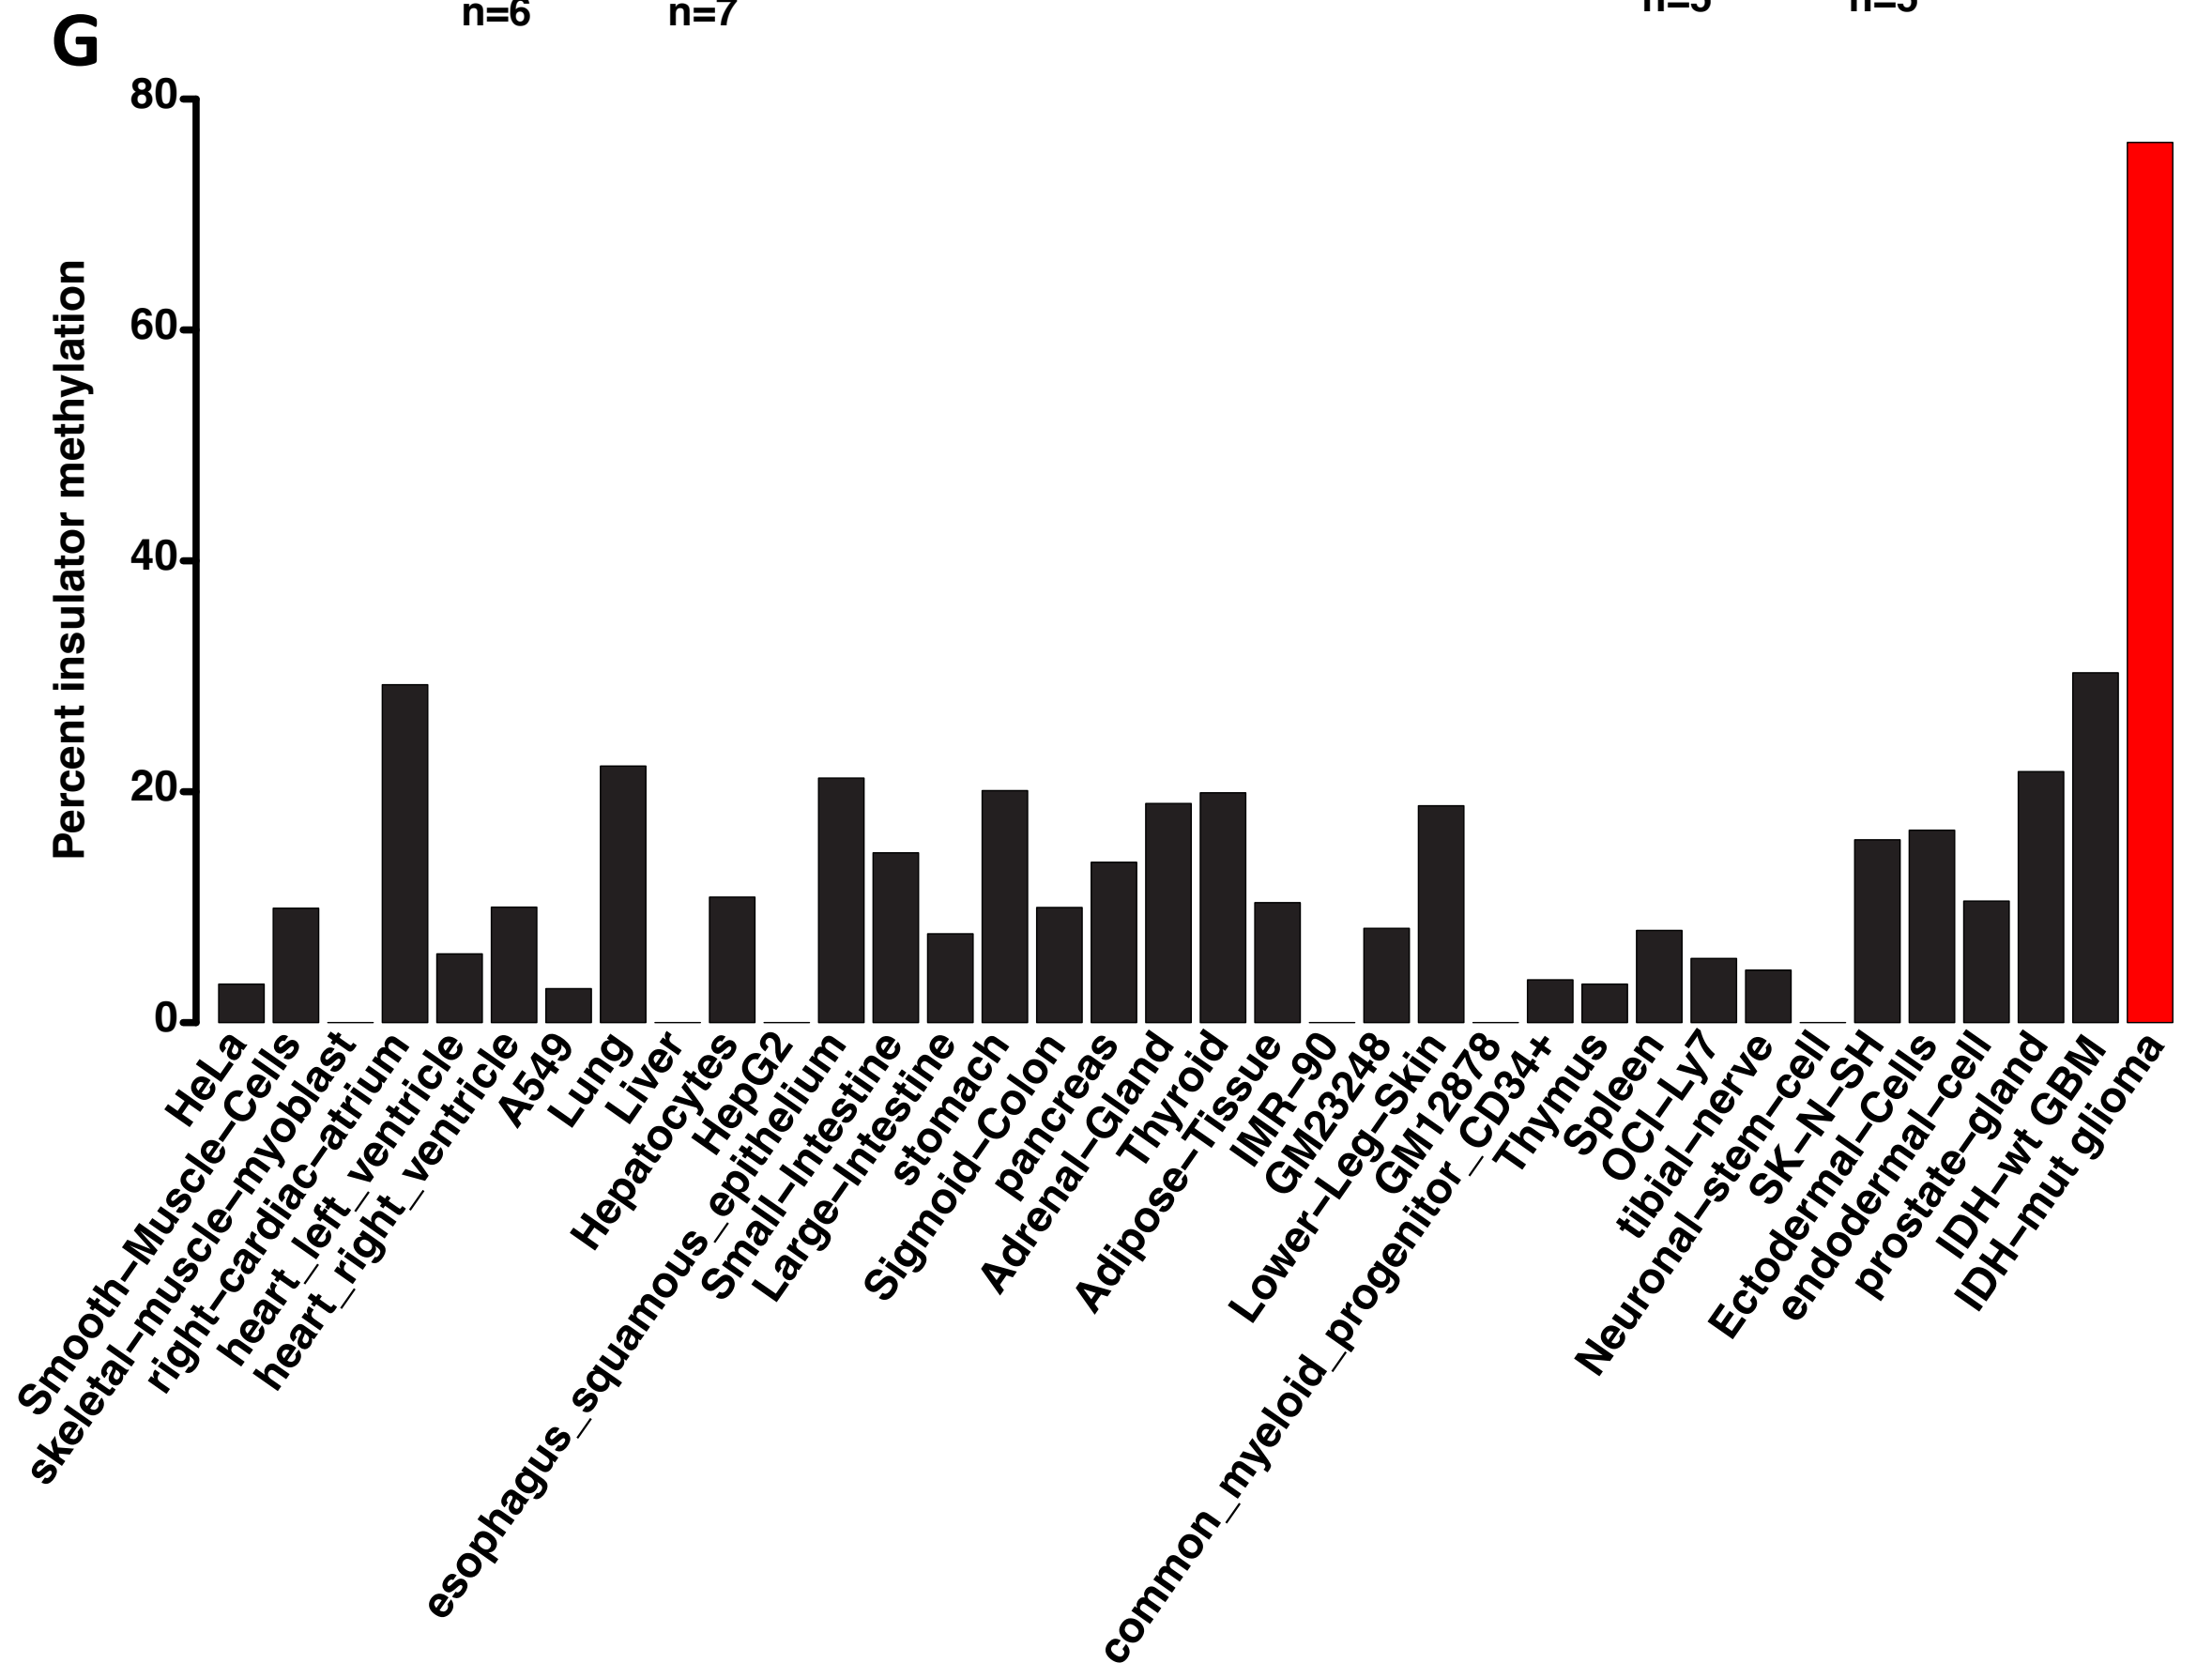

Supplement: NIHMS1915931-supplement-1.pdf [file NIHMS1915931-supplement-1.pdf]

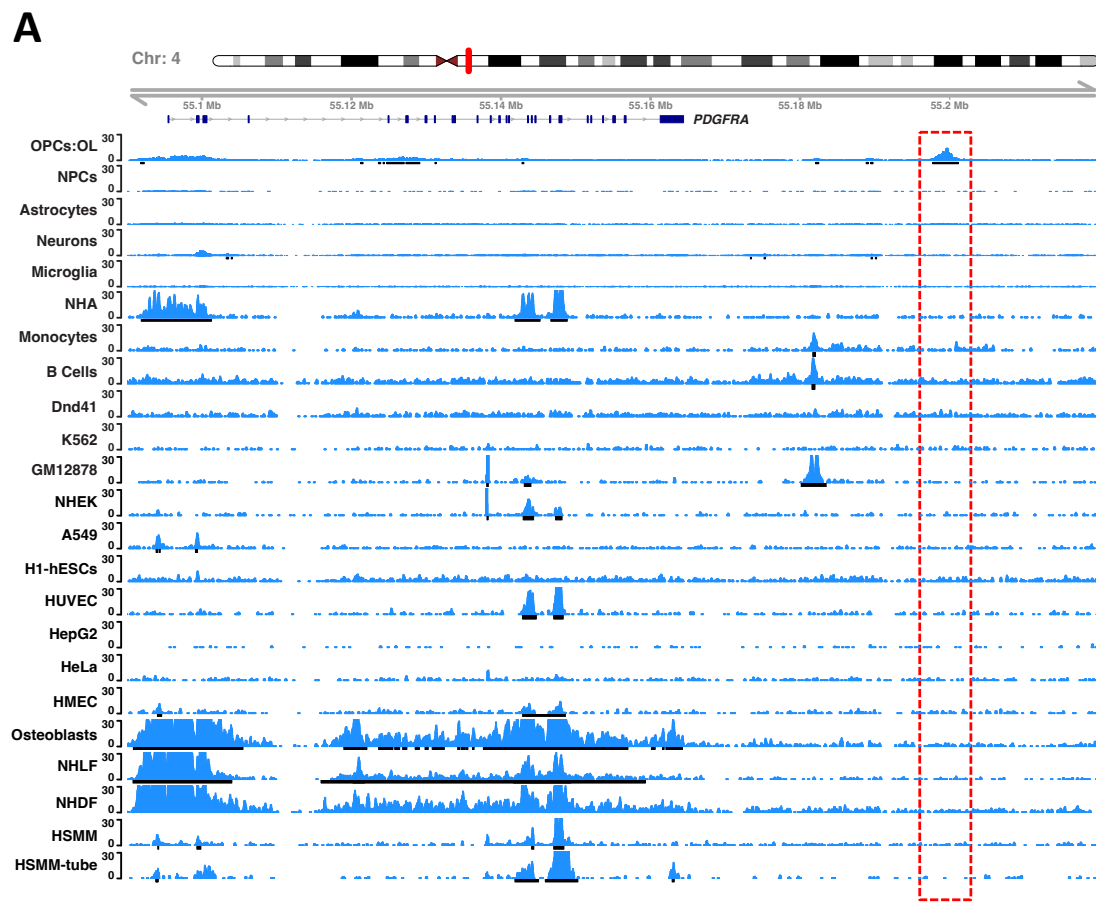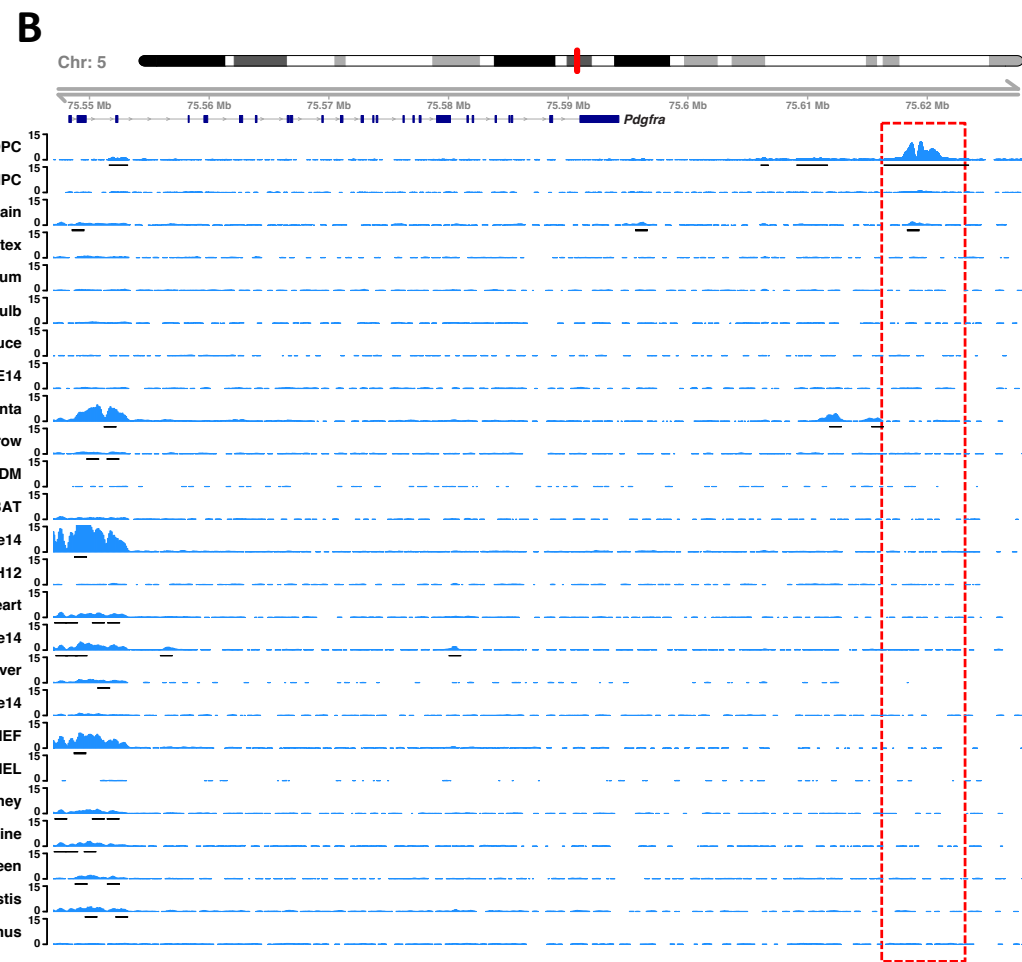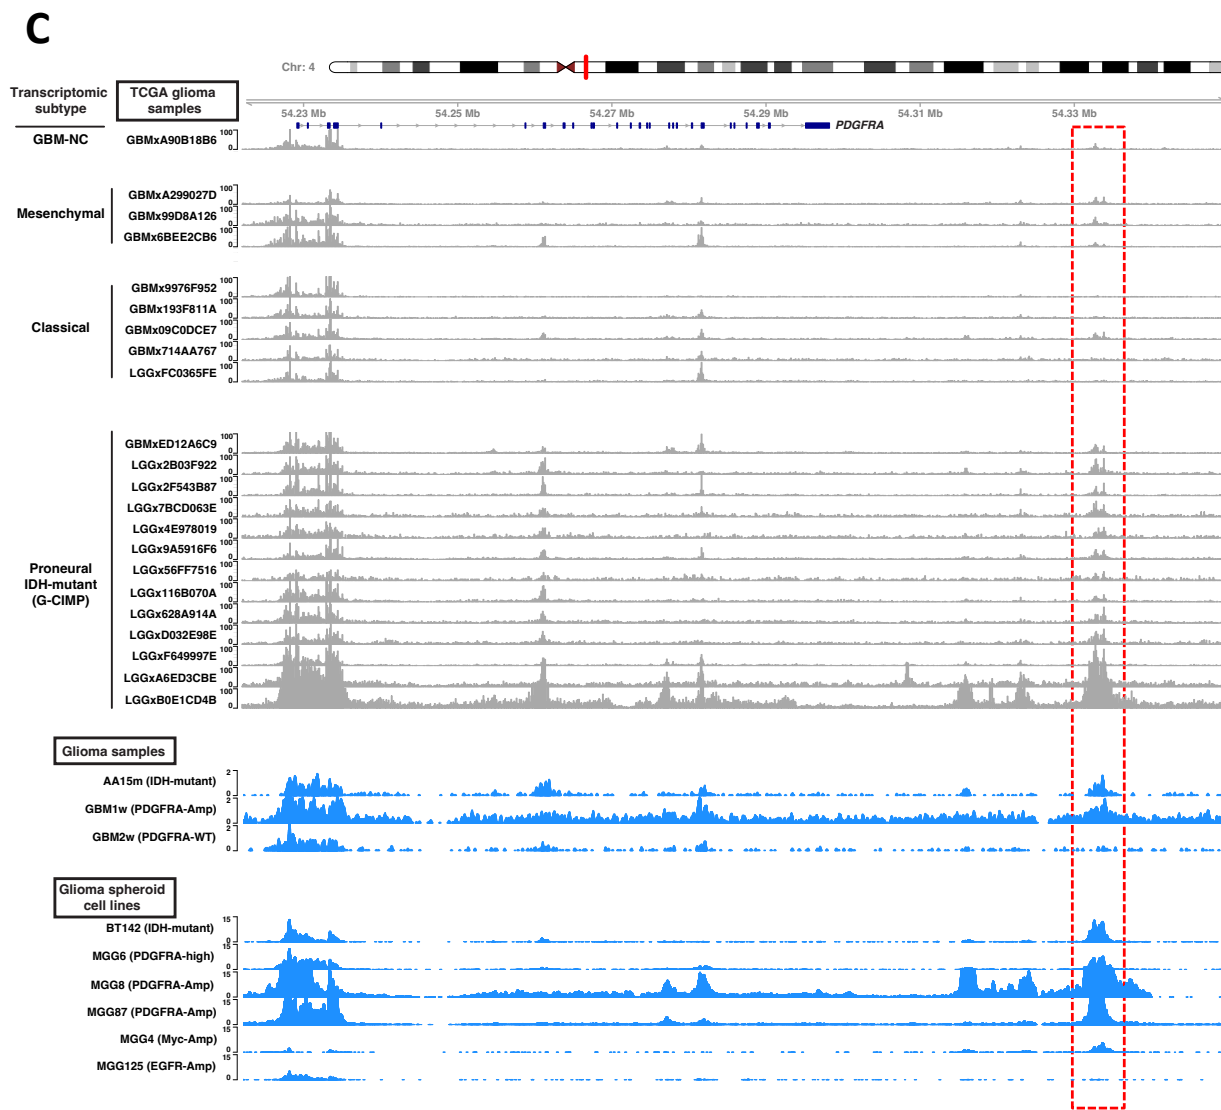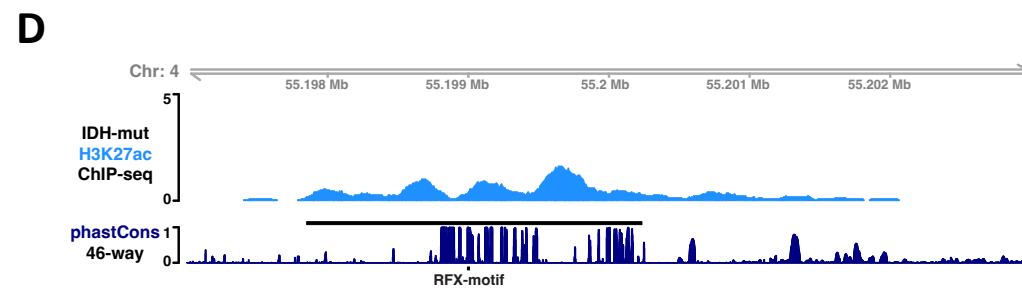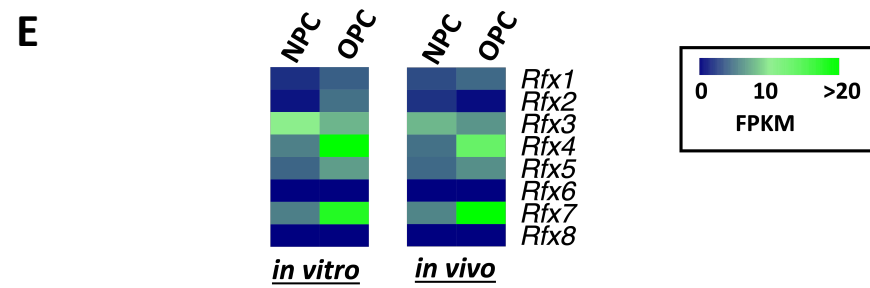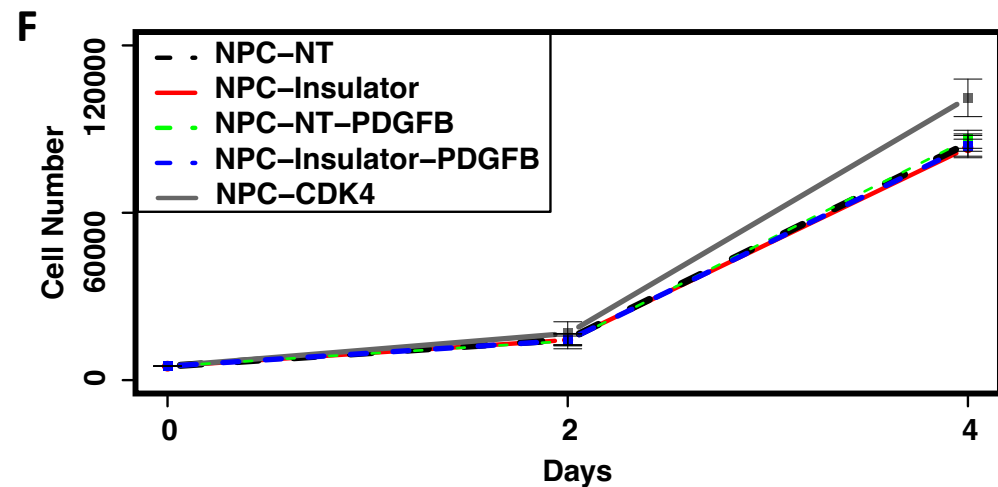

Supplement: NIHMS1915931-supplement-2.pdf [file NIHMS1915931-supplement-2.pdf]

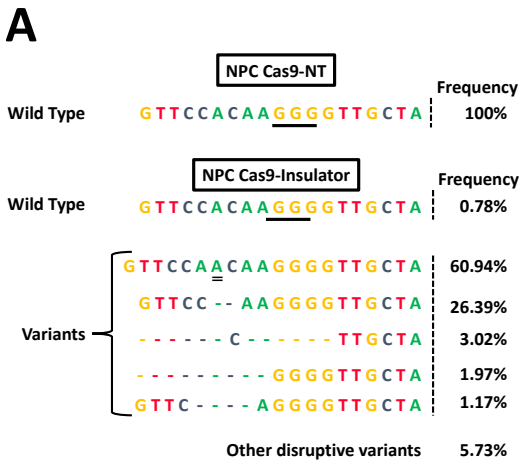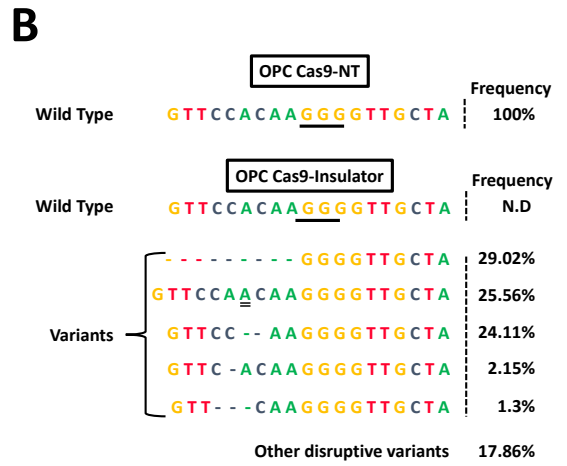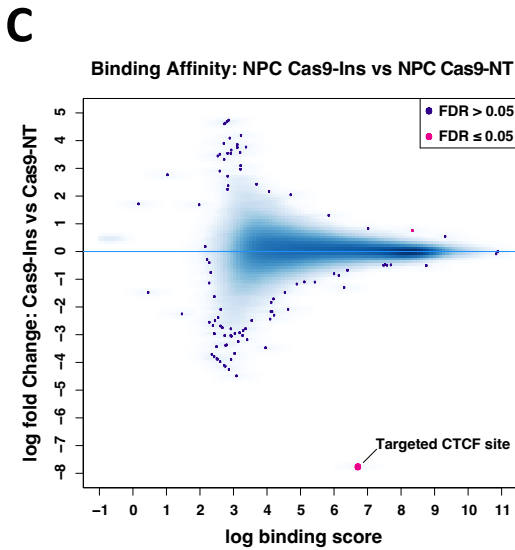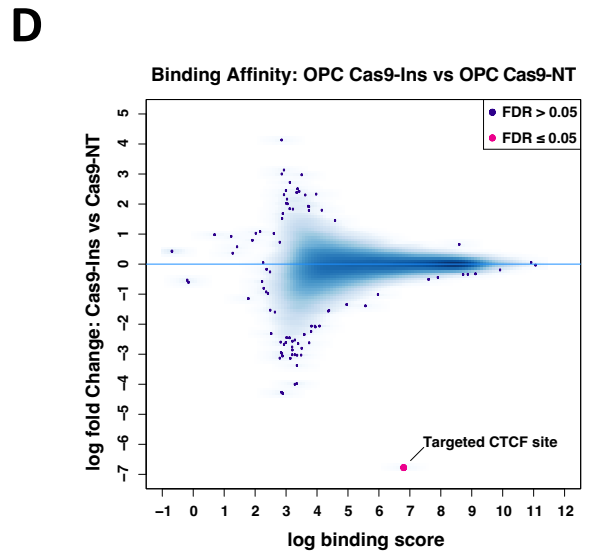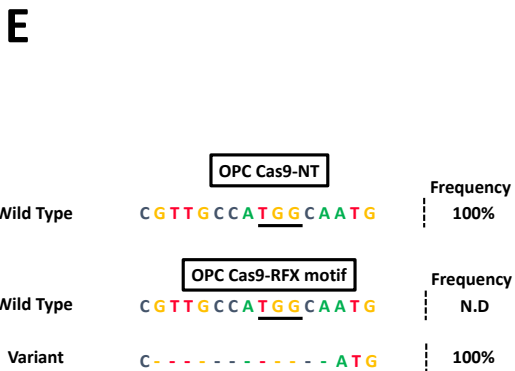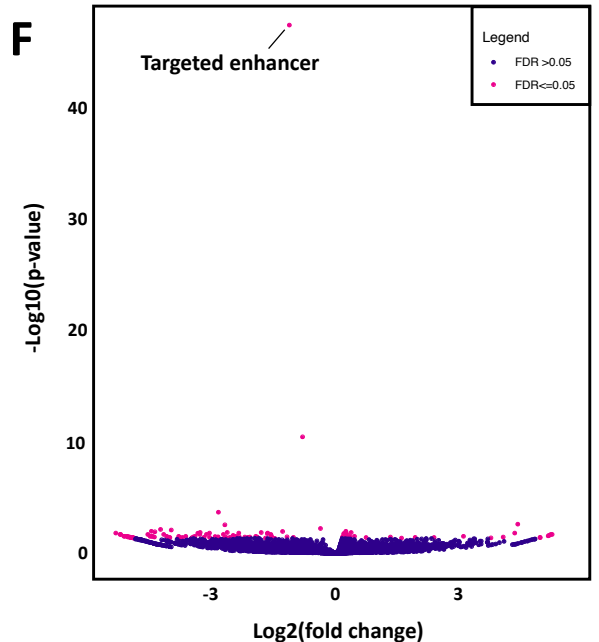

Supplement: NIHMS1915931-supplement-3.pdf [file NIHMS1915931-supplement-3.pdf]

**A** IDH-Mutant G-CIMP High IDH-Mutant G-CIMP Low

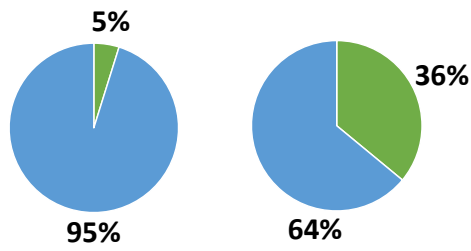

CDKN2A HOM-DEL CDKN2A WT

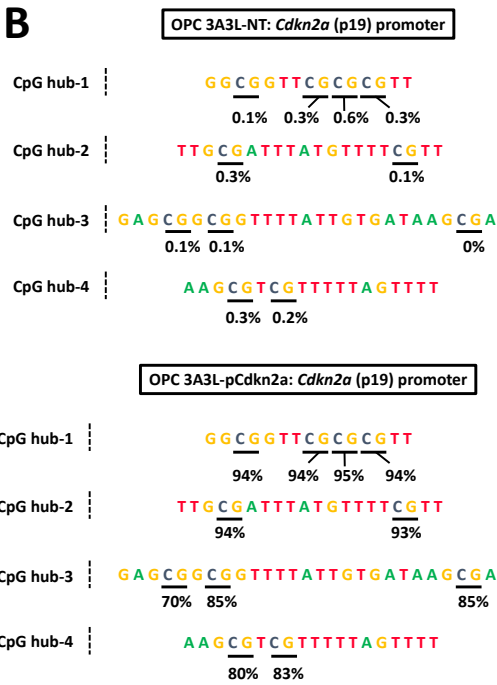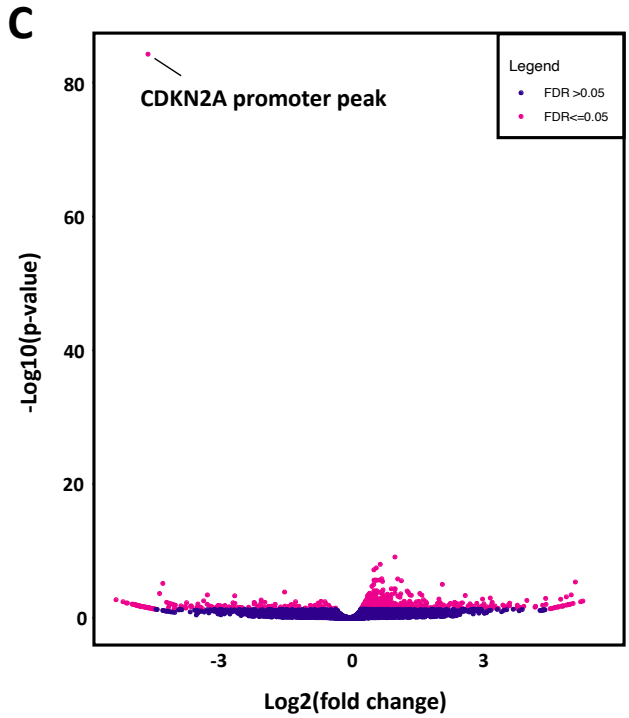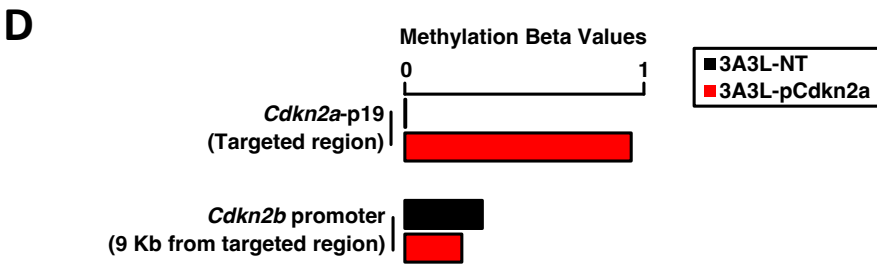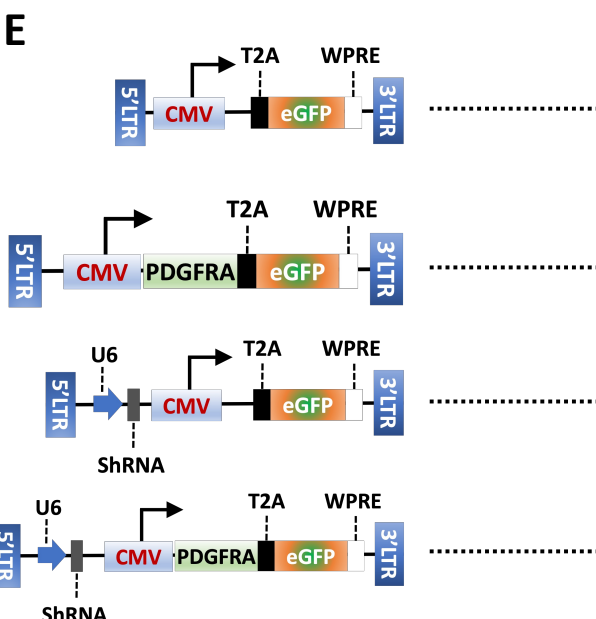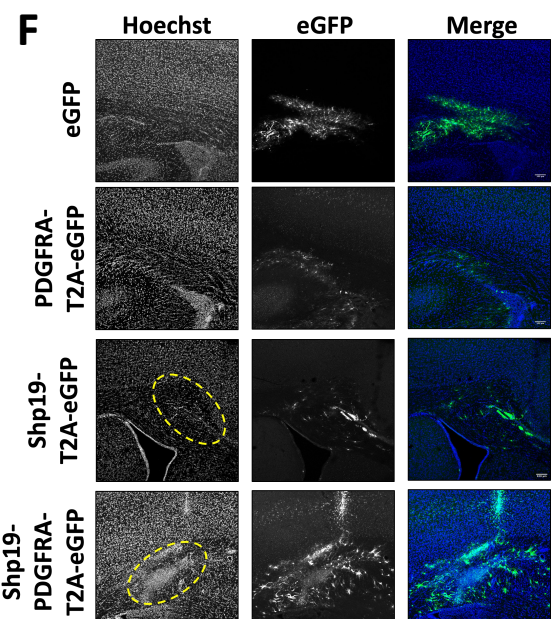

Supplement: NIHMS1915931-supplement-4.pdf [file NIHMS1915931-supplement-4.pdf]

**A**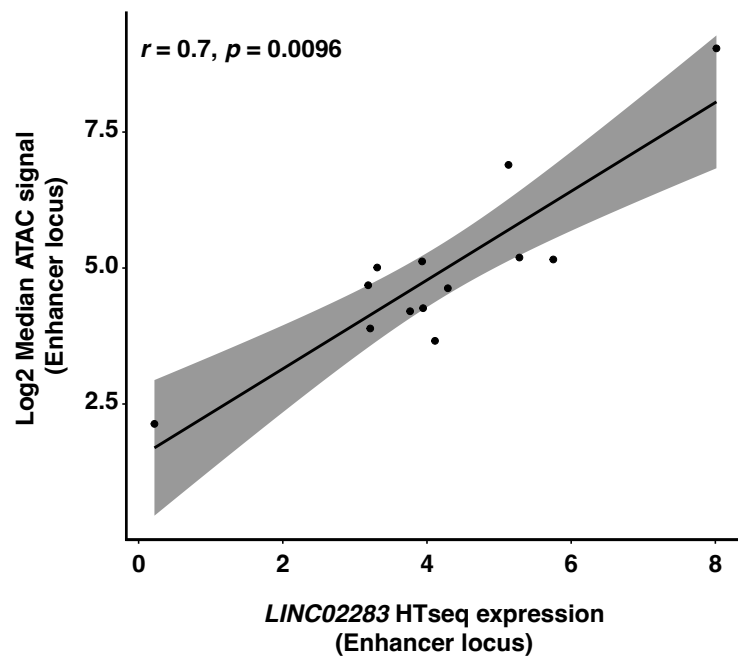**B**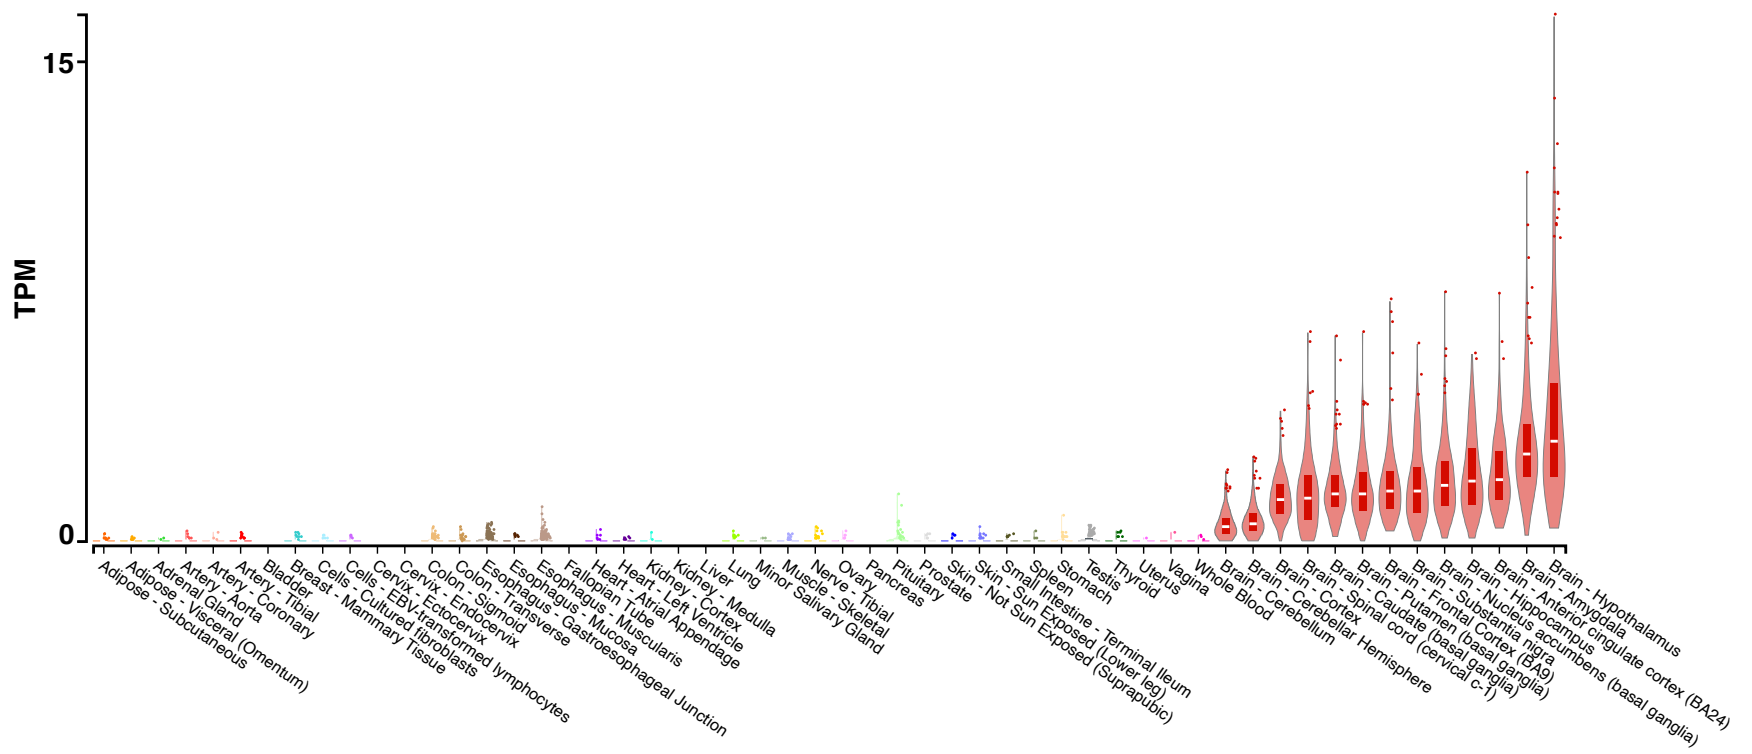**C**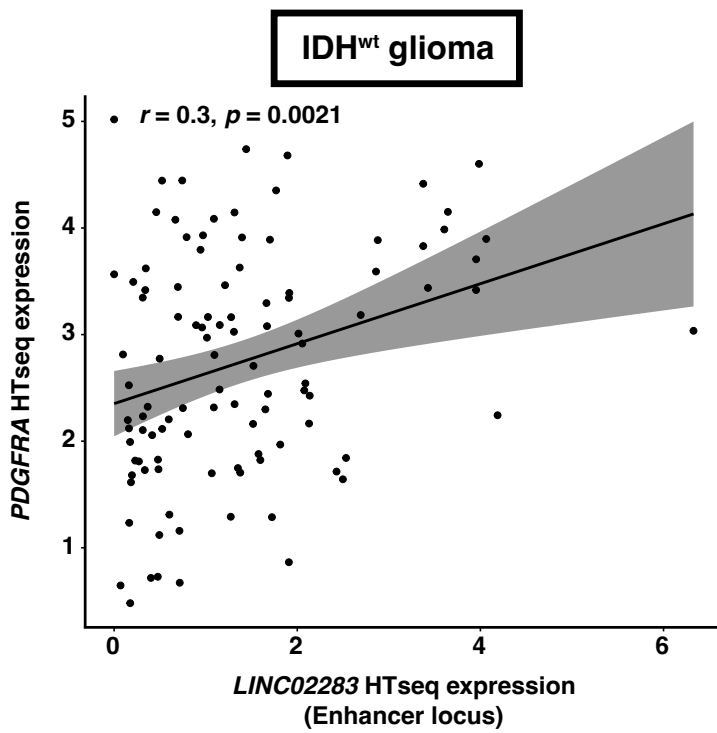**D**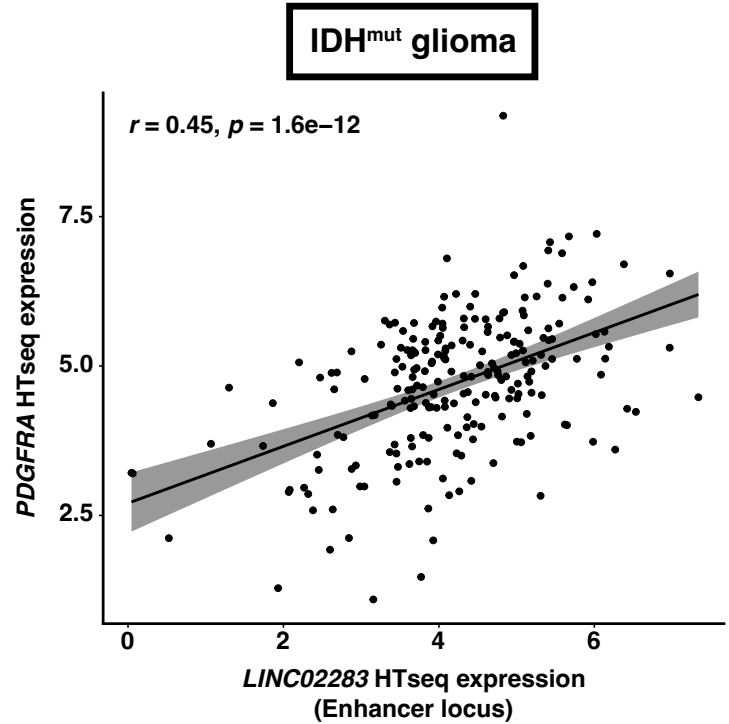**E**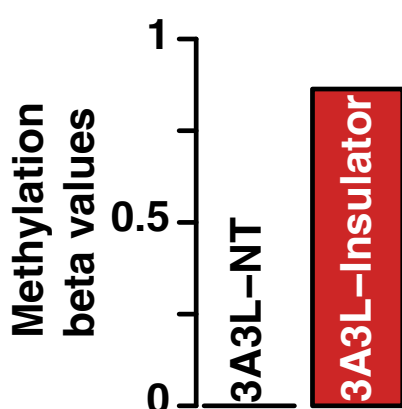

CTCF ChIP-seq signal (RPM normalized)

**F**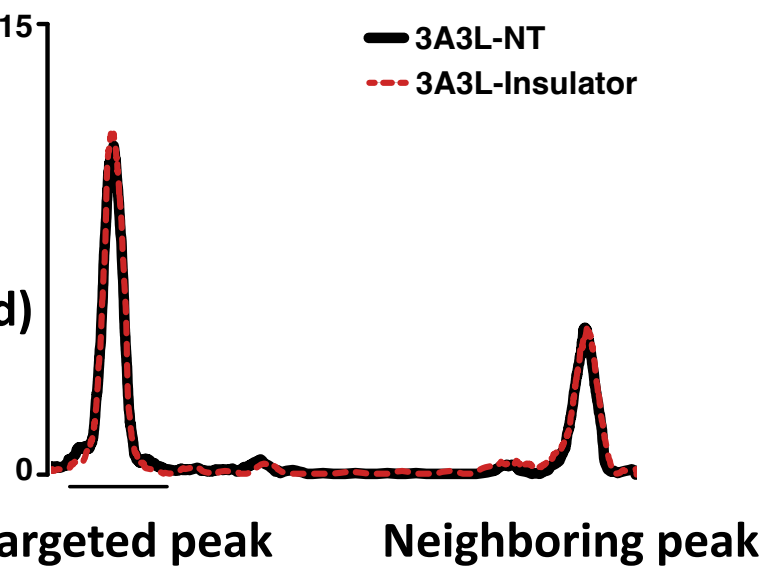

Supplement: NIHMS1915931-supplement-5.pdf [file NIHMS1915931-supplement-5.pdf]
